# Supplementary material for: Gut microbiota signature in treatment-naïve attention-deficit/hyperactivity disorder
Source: PubMed Central journal article supplement (PMC8266901; doi:10.1038/s41398-021-01504-6), 2021-07-08
Supplement: 41398_2021_1504_MOESM4_ESM.pdf [file 41398_2021_1504_MOESM4_ESM.pdf]

### Bray-Curtis distance

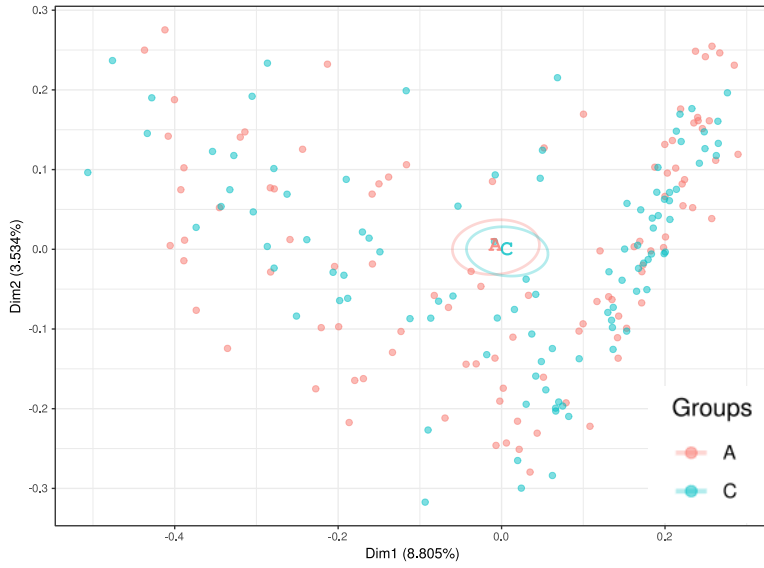

PERMANOVA  
 $R^2=0.006$   
P-value = 0.316

### Unweighted Unifrac distance

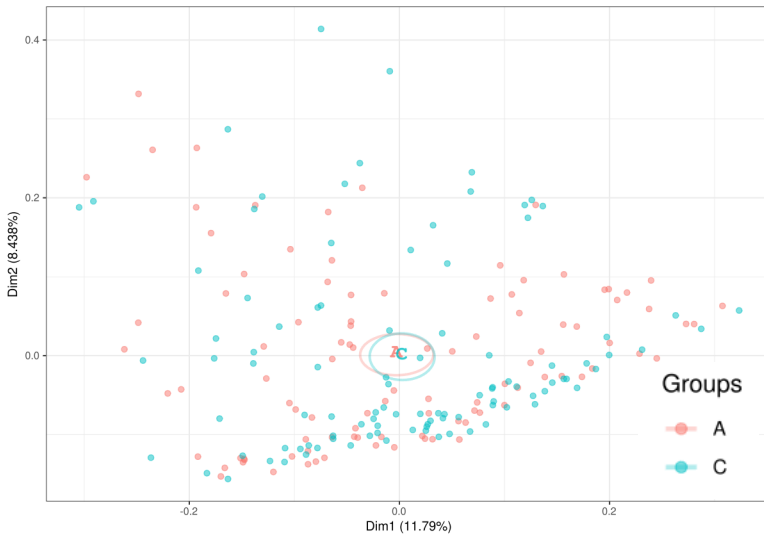

PERMANOVA  
 $R^2=0.006$   
P-value = 0.125

### Weighted Unifrac distance

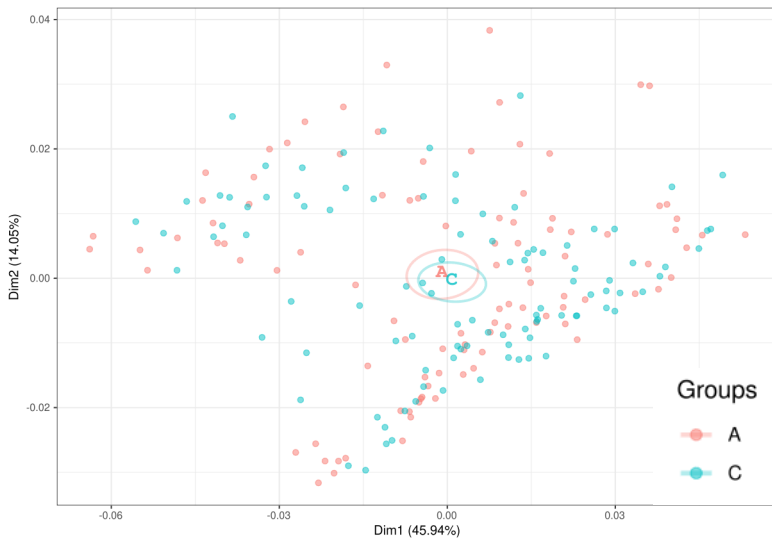

PERMANOVA  
 $R^2=0.004$   
P-value = 0.54
