# Supplementary material for: Gut microbiota signature in treatment-naïve attention-deficit/hyperactivity disorder
Source: PubMed Central journal article supplement (PMC8266901; doi:10.1038/s41398-021-01504-6), 2021-07-08

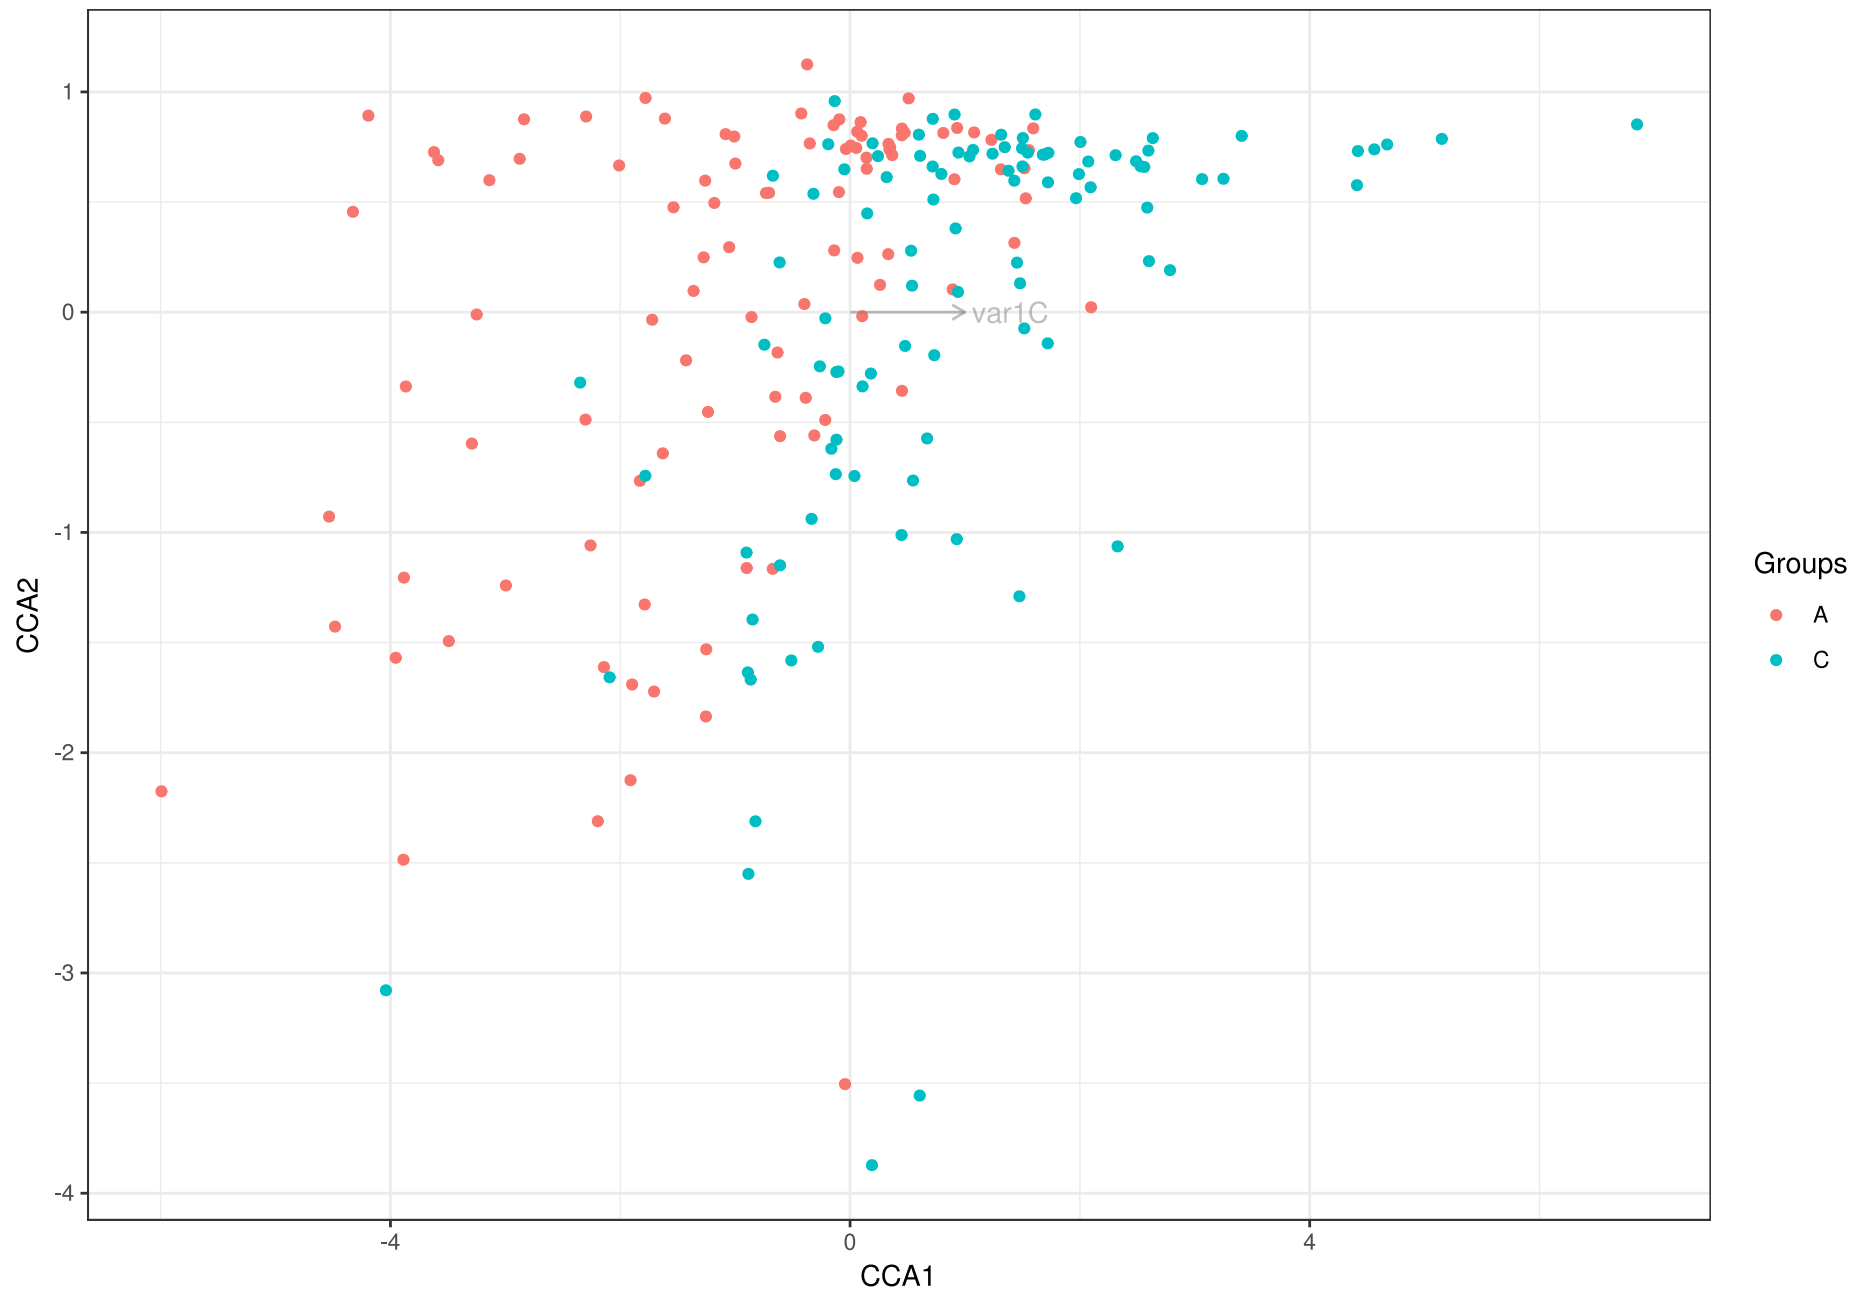

Supplement: 41398_2021_1504_MOESM5_ESM.pdf [file 41398_2021_1504_MOESM5_ESM.pdf]
